1 Chromosome level draft genomes of the fall  
2 armyworm, *Spodoptera frugiperda* (Lepidoptera:  
3 Noctuidae), an alien invasive pest in China

4 Huan Liu<sup>1,10\*</sup>, Tianming Lan<sup>1,11\*</sup>, Dongming Fang<sup>1,11\*</sup>, Furong Gui<sup>2,9\*</sup>,  
5 Hongli Wang<sup>1,10</sup>, Wei Guo<sup>3</sup>, Xiaofang Cheng<sup>4</sup>, Yue Chang<sup>5</sup>, Shuqi  
6 He<sup>2</sup>, Lihua Lyu<sup>6</sup>, Sunil Kumar Sahu<sup>1,10</sup>, Le Chen<sup>7</sup>, Haimeng Li<sup>1</sup>, Ping  
7 Liu<sup>4</sup>, Guangyi Fan<sup>5</sup>, Tongxian Liu<sup>8</sup>, Ruoshi Hao<sup>9</sup>, Haorong Lu<sup>1,10</sup>, Bin  
8 Cheng<sup>9</sup>, Shusheng Zhu<sup>2</sup>, Zhihui Lu<sup>9</sup>, Fangneng Huang<sup>12</sup>, Wei Dong  
9 <sup>1,10</sup>, Yang Dong<sup>2</sup>, Le Kang<sup>3</sup>, Huanming Yang<sup>1,10</sup>, Jun Sheng<sup>2,9#</sup>,  
10 Youyong Zhu<sup>2#</sup>, Xin Liu<sup>1,10#</sup>.

11 1. BGI-Shenzhen, Beishan Industrial Zone, Yantian District, Shenzhen 518083,  
12 China

13 2. Yunnan Agricultural University, Kunming 650201, China

14 3. State Key Laboratory of Integrated Management of Pest Insects and Rodents,  
15 Institute of Zoology, Chinese Academy of Sciences, Beijing 100101, China

16 4. MGI, BGI-Shenzhen, Shenzhen 518083, China

17 5. BGI-Qingdao, BGI-Shenzhen, Qingdao 266555, China

18 6. Plant protection research institute , Guangdong Academy of Agricultural  
19 Sciences, Guangzhou 510640, China

20 7. BGI-Yunnan, No. 389 Haiyuan Road, High-tech Development Zone, Kunming,  
21 Yunnan 650106, China

22 8. Plant Medical College, Qingdao Agricultural University. Qingdao 266109,  
23 China

24 9. Yunnan Plateau Characteristic Agriculture Industry Research Institute ,  
25 Kunming 650201, China

26 10. State Key Laboratory of Agricultural Genomics, BGI-Shenzhen, Shenzhen  
27 518083, China,

28 11. China National GeneBank, Jinsha Road, Dapeng New District, Shenzhen  
29 518120, China,

30 12. Department of Entomology, Louisiana State University AgCenter

31

32 \*These authors contributed equally to this work.

33 #Correspondence: Xin Liu( [liuxin@genomics.cn](mailto:liuxin@genomics.cn)), Youyong Zhu  
34 ( [yyzhu@ynau.edu.cn](mailto:yyzhu@ynau.edu.cn) ), or Jun Sheng( [shengjunpuer@163.com](mailto:shengjunpuer@163.com) )

35 Abstract:

36 The fall armyworm (FAW), *Spodoptera frugiperda* (J.E. Smith) is a severely  
37 destructive pest native to the Americas, but has now become an alien invasive  
38 pest in China, and causes significant economic loss. Therefore, in order to make  
39 effective management strategies, it is highly essential to understand genomic  
40 architecture and its genetic background. In this study, we assembled two  
41 chromosome scale genomes of the fall armyworm, representing one male and  
42 one female individual procured from Yunnan province of China. The genome  
43 sizes were identified as 542.42 Mb with N50 of 14.16 Mb, and 530.77 Mb with  
44 N50 of 14.89 Mb for the male and female FAW, respectively. We predicted about  
45 22,201 genes in the male genome. We found the expansion of cytochrome P450  
46 and glutathione s-transferase gene families, which are functionally related to the  
47 intensified detoxification and pesticides tolerance. Further population analyses of  
48 corn strain (C strain) and rice strain (R strain) revealed that the Chinese fall  
49 armyworm was most likely invaded from Africa. These strain information,  
50 genome features and possible invasion source described in this study will be  
51 extremely important for making effective strategies to manage the fall  
52 armyworms.

53 Key Words: Fall armyworm, *Spodoptera frugiperda*, Chromosome-level genome,  
54 Insect, Pest

55 1 Introduction

56 It has been more than 100 years since the Fall armyworm (FAW), *Spodoptera*  
57 *frugiperda* (J.E. Smith) was reported to damage maize and other crops in the  
58 USA<sup>1</sup>. It is a severely destructive agricultural pest native to Americas which  
59 survives the whole year in the tropical and subtropical area from far south

60 Argentina, Chile and La Pampa to far north Florida, Texas, Mexico and the  
61 Caribbean<sup>2-5</sup>. It cannot survive severe winters because of the lack of diapause.  
62 However, FAW has a remarkable capacity of long-distance migration, with  
63 which the FAW can fly over 100 km per night<sup>6</sup>. Each spring, it can migrate over  
64 2000 km from the overwintering areas to reinvade more northern regions, even  
65 up to Canada<sup>4,7,8</sup>. Recently, FAW spread out from its native region and invaded  
66 into Africa in 2016 with the report in São Tomé, Bénin, Togo and Nigeria<sup>9</sup>. This  
67 invasion rapidly became widespread in the whole sub-Saharan Africa till  
68 October 2017<sup>10,11</sup>. Following this trend, FAW soon invaded into many Asian  
69 countries, including India, Yemen, Thailand, Myanmar and Sri Lanka in 2018<sup>12-14</sup>.  
70 Early R *et al* (2018)<sup>5</sup> forecasted that China is one of the most vulnerable countries  
71 of being invaded by the FAW according to the information on frequent  
72 commercial trade and passenger transportation between Africa and China. Half a  
73 year later after this forecast, in January 2019, International Plant Protection  
74 Convention (IPPC) Contact Point for China spotted FAW for the first time in  
75 Puer and Dehong city, Yunnan Province, China  
76 (<https://www.ippc.int/en/news/first-detection-of-fall-armyworm-in-china/>). This  
77 invasive pest has rapidly invaded many provinces in China by June 2019. Now,  
78 the FAW has been detected in large parts of the world (Figure 1).

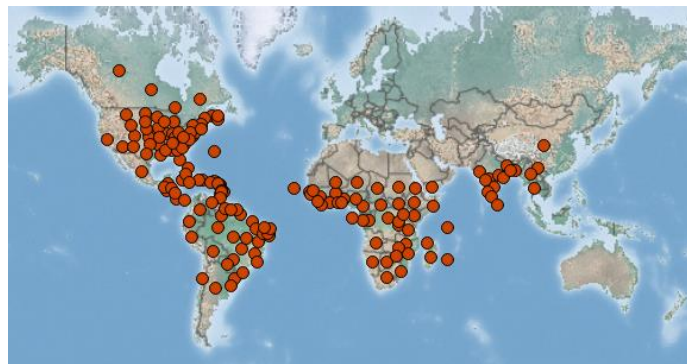

79

80

Figure 1 The distribution of the FAW all over the world<sup>15</sup>.

81 There are several hosts of FAW, which mainly includes 186 plant species from 42  
82 families<sup>16</sup>. Although FAW is a highly polyphagous pest, graminaceous plants are  
83 their preferred hosts, such as maize, rice, sorghum and other major agricultural  
84 species. Especially, maize is most likely to be attacked than other plant species<sup>9</sup>.  
85 Maize is very important food security of many countries in Asia, Africa, and  
86 Latin America (<https://maize.org/projects-cimmyt-and-iita-2/>), and now are  
87 facing severe threats from the infestation of the FAW. The production of maize  
88 infested by the FAW can suffer yield loss of 40% to 72%, and in some plots 100%  
89 total has been reported<sup>17-19</sup>. The yield loss of maize can reach 8.3 to 20.6m tons per  
90 year in just 12 African countries without any control methods for FAW,

91 according to the study conducted by Centre for Agriculture and Biosciences  
92 International (CABI)<sup>20</sup>. For Brazil alone, cost to control the FAW on maize is more  
93 than 600 million dollars per year<sup>21</sup>. The economic and the yield losses by FAW is  
94 a major concern worldwide.

95 The FAW is not a new species to science; it has been an herbivorous pest for  
96 many years. However, the mostly common used approach to mitigate the  
97 damage to crops is still the broad-spectrum insecticides<sup>22</sup>. The use of insecticides  
98 highly relies on the knowledge of farmers, but many farmers even do not know  
99 the name of the pest<sup>23</sup>. Lack of scientific guidance leads to the inappropriate use  
100 of pesticides. Besides, the effective management of FAW may require five sprays  
101 of pesticides per maize cycle<sup>21</sup>, and many smallholder farmers cannot afford the  
102 expensive costs for it, resulting in the use of low-quality products or low dose  
103 sprays<sup>24</sup>. Moreover, the FAW always hides inside the stem of maize, this makes  
104 the insecticide much less effective. Although many pesticides are less harmful to  
105 the environment and humans, all these factors can lead to the sublethal effects,  
106 which possibly help the FAW to evolve resistance against the pesticides<sup>25-27</sup>. An  
107 effective compensating management for insecticides is the use of *Bacillus*  
108 *thuringiensis* (Bt) toxins produced by the bacterium. Bt plants have been  
109 proved fatal to many insect pests, including the FAW<sup>28-30</sup>. The Bt toxin provides  
110 much longer protection than insecticides and less harmful to the environment  
111 and humans. Although some research reported the resistance of FAW to Bt  
112 maize<sup>29,30</sup>, multiple genes or new gene with more or new Bt toxin expressed are  
113 still thought to have a good performance for resisting the FAW<sup>29,30</sup>. Biological  
114 control, including the introduction of natural enemies and using companion  
115 cropping system<sup>19,21,25,31,32</sup>, is also an effective way to resist the FAW.

116 The FAW at least consist of two morphological identical but genetically distinct  
117 subpopulations, the corn strain (C strain) and rice strain (R strain)<sup>33-35</sup>. The two  
118 strains have their own preferable host plants. The C strain is preferentially  
119 associated with maize and other large grasses, but the C strain prefers rice and  
120 large grasses<sup>36,37</sup>. The C strain is subdivided into two subgroups, the FL-type and  
121 the TX-type<sup>38,39</sup>. The TX-type is distributed in most of the Americas, but the FL-  
122 type is only limited to Florida and the Caribbean<sup>3,35,40,41</sup>. Each strain has its strain  
123 specific physiological traits, leading to some strain-specific response to biological  
124 and chemical agents<sup>36,37,42</sup>. The C strain larvae are more tolerant than the R strain  
125 to the methyl parathion, cypermethrin, cypermethrin and  $\delta$ -endotoxin from  
126 transgenic Bt plant<sup>43</sup>. Therefore, the origin of FAW needs to be considered to  
127 make effective strategies to manage the FAW. The *Cytochrome c oxidase subunit I*  
128 (*COI*) and the *Triosephosphate isomerase (Tpi)* gene are also selected for identifying

129 the subtype of the FAW, but these markers cannot always give the right  
130 identifications<sup>44</sup>.

131 The management of the FAW needs more detailed genetic information to help  
132 people know more about the FAW, to find more new genes to develop more  
133 effective Bt plants, and to more accurately identify the different strains for  
134 precision spraying of pesticides. Although several genomes of the FAW has been  
135 sequenced and assembled<sup>45-47</sup>, the assemblies were fragmented. Moreover, two  
136 genomes were assembled using the Sf21<sup>45</sup> and Sf9<sup>47</sup> cell line, respectively, the  
137 resource was unique that cannot well provide a comprehensive reference. In this  
138 study, we assembled two FAW genomes to the chromosome level using two  
139 samples (one male, one female) collected from Yunnan Province, China. We  
140 analyzed the subtype of the FAW invaded Yunnan province, and also discussed  
141 the possible resource of the invaded FAW in China. We are also screening  
142 expanded gene families to seek some key genes with the function of polyphagia  
143 and tolerance to insecticides. China is the second largest corn producer after the  
144 USA; therefore, it is urgent to select a series of methods to control the FAW. This  
145 study provided key information to help make strategies to manage the FAW in  
146 China.

## 147 2 Materials and Methods

### 148 2.1 Samples and treatments

149 We collected seven FAW samples, including four adults, two fifth-instar larvae  
150 and two sixth-instar larvae (Table 1). The four adult FAWs were collected from  
151 Yunnan Province, China, and the larvae were collected from Guangdong  
152 Province, China. One male and one female adult individual were used for  
153 genome sequencing and assembly (Figure 2). Two other adult FAWs were used  
154 to capture the conformation of chromosomes to perform the chromosome level  
155 genome assembly. One fifth-instar larva and one sixth-instar larva were  
156 subjected for the transcriptomic studies. One sixth-instar larva was used for  
157 whole genome sequencing with 5K and 300bp insert size. All samples were  
158 intestinal and ovarian, and thoroughly cleaned before performing DNA or RNA  
159 isolation.

160 Table 1 Samples used in this study

| Sample Identifier | Species                      | Location             | Sex     | Instars      |
|-------------------|------------------------------|----------------------|---------|--------------|
| SFynMstLFR        | <i>Spodoptera frugiperda</i> | Kunming, Yunnan      | Male    | Adult        |
| SFynFMstLFR       | <i>Spodoptera frugiperda</i> | Kunming, Yunnan      | Female  | Adult        |
| SFgdRNA 1         | <i>Spodoptera frugiperda</i> | Guangzhou, Guangdong | Unknown | Fifth-instar |
| SFgdRNA 2         | <i>Spodoptera frugiperda</i> | Guangzhou, Guangdong | Unknown | Sixth-instar |
| SFgdWGS           | <i>Spodoptera frugiperda</i> | Guangzhou, Guangdong | Unknown | Sixth-instar |

161

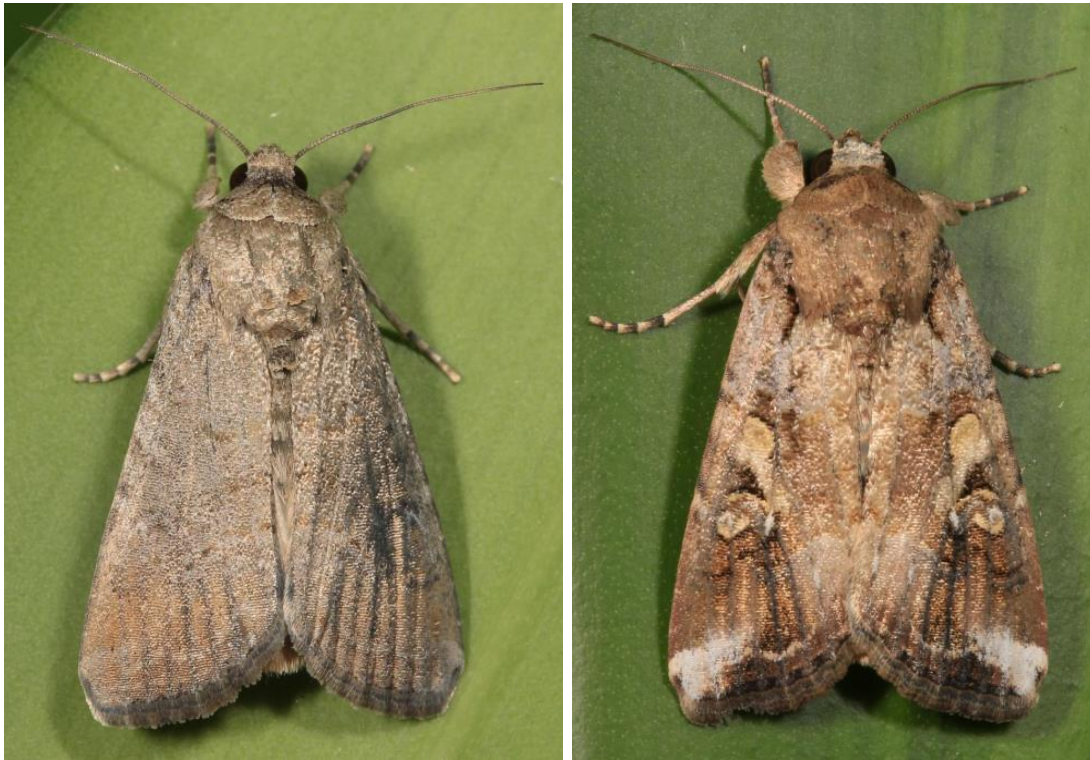

162

163 Figure 2 The two adult fall armyworm (FAWs) used for genome assembly. The left FAW is  
164 female, the right FAW is the male individual.

## 165 2.2 DNA isolation, library preparation, sequencing and genome assembly.

166 The high molecular weight DNA was extracted using the separated muscle tissue  
167 by following the protocol recommended by Cheng et al (2018)<sup>48</sup>. We then used  
168 the single tube long fragment read (stLFR) technology<sup>49</sup> to preparing the co-  
169 barcoding DNA libraries with the MGIEasy stLFR Library Prep Kit (lot number:  
170 1000005622), and the libraries were then loaded on the sequencer for sequencing  
171 according to the protocol of MGISEQ-2000<sup>50</sup>. To testify the accuracy of genome  
172 assembly, we constructed a DNA library with a 5kb insert size and sequenced by  
173 BGISEQ-500 sequencer. To finally ligate the scaffolds to chromosomes, Hi-C  
174 technology<sup>51</sup> was used to capture the conformation of chromosomes using  
175 another two adult individuals. The primary genome was assembled using the  
176 supernova (v2.1.1)<sup>52</sup> software with the parameters `--maxreads=700M`. We filled  
177 gaps by use of GapCloser<sup>53</sup> and GapCloser stLFR (unpublished method) with the  
178 default parametes. Finally, we performed the chromosome concatenation using  
179 the Hi-C generated data by 3d-DNA pipeline<sup>54</sup>.

## 180 2.3 Comparative genomics analysis

181 Identification of orthology and paralogy groups of *Spodoptera frugiperda* genes  
182 and other considered genomes were done using OrthoMCL<sup>55</sup> methods on the all-  
183 versus-all BLASTP alignment (e-value, <1e-5). We constructed gene families for  
184 nine species including *Bombyx mori*, *Danaus plexippus*, *Drosophila melanogaster*,  
185 *Heliconius melpomene*, *Helicoverpa armigera*, *Manduca sexta*, *Plutella xylostella*,  
186 *Spodoptera litura* and *Spodoptera frugiperda*. The phylogenetic tree, including these  
187 nine species, was constructed using the combined set of all the single copy genes.

188 To search for homology, we compared protein-coding genes of *Spodoptera*  
189 *frugiperda* to that of other species using BLASTP with an E-value threshold of 1e-  
190 5. Base on the Whole-genome BLASTP and the genome annotation results, we  
191 detected the syntenic blocks using MCscan<sup>56</sup>. A region with at least five syntenic  
192 genes and no more than 15 gapped genes was defined as a syntenic block.

#### 193 2.4 RNA isolation, transcriptome libraries preparation and sequencing

194 The RNA extraction kit (RNeasy Mini Kit, Qiagen) was used for the total RNA  
195 isolation. We performed the RNase-free agarose gel to check the contamination,  
196 and then the RNA integrity and purity were measured by Agilent 2100  
197 Bioanalyzer system (Agilent, United States) and NanoDrop Spectrophotometer  
198 (THERMO, United States), respectively. The extracted RNA was fragmented into  
199 200-400 bp and reverse transcribed to cDNA for library preparation. The libraries  
200 were prepared to follow the manufacturer's instructions for the BGISEQ-500  
201 sequencing platform. Pair-end 100 sequencing was performed on the BGISEQ-  
202 500 sequencer using the processed libraries.

#### 203 2.4 Bioinformatics analysis for transcriptome data

204 Raw data were firstly processed using the Trimmomatic to filter the reads with  
205 adaptors and reads with the proportion of Ns and low-quality bases larger than  
206 10% by SOAPfilter. Bridger software (v20141201) was used to *de novo* assemble  
207 the transcriptome, the redundancies were then removed by TGICL. The contigs  
208 were concatenated into scaffolds and further assembled to unigenes by clustering  
209 and removing redundancy.

210 FPKM was calculated to estimate the expression level of unigenes. In the study,  
211 the reads were mapped against the unigene library using Bowtie, and then  
212 unique mapped reads were selected for estimating the expression level by  
213 combining eXpress. Finally, DEG unigenes were selected with differential  
214 expression level with the parameter of FDR  $\leq 0.01$  and Fold Change  $\geq 4$ .

#### 215 2.5 Identifying the strains and the possible source of FAW invasion in China

216 We used the *Tpi* gene as a DNA maker to identify the strain of the FAW invaded  
217 into China. We identified the *Tpi* gene fragments from four FAWs, including two  
218 from Yunnan province (sequences were retrieved from the whole genome  
219 sequencing data) and two from Guangdong province (sequences were retrieved  
220 from the RNA-seq data). Eight sites (TpiE4-129, TpiE4-144, TpiE4-165, TpiE4-168,  
221 TpiE4-180, TpiE4-183, TpiE4-192, TpiE4-198) in the fourth exon of the *Tpi* gene  
222 were used for determining the strains and a possible source of the invaded  
223 FAW<sup>57</sup>. The fourth intron of the *Tpi* gene<sup>57</sup> was used for constructing the  
224 phylogenetic tree using the PhyML (v3.0)<sup>58</sup> software with the Maximum-  
225 Likelihood methods to assist in identifying the strains. Only two *Tpi* fourth  
226 introns were used for phylogenetic analysis because we cannot retrieve the  
227 introns from RNAseq data. 112 sequences of the fourth intron of the *Tpi* gene  
228 with strain information were downloaded from NCBI (Table S1). The sequence  
229 alignments were performed using the Clustal W<sup>59</sup>.

### 230 3 Results and discussion

#### 231 3.1 Chromosome level genome assembly for two FAWs

232 Only one individual was used for genome sequencing for both the male and  
233 female genome assembly, which was less than the number used for genome  
234 assembly by Gouin A *et al* (2017)<sup>46</sup>. This maximally decreased the heterozygosity  
235 level. A total of 2 $\mu$ g and 1.6 $\mu$ g total genomic DNA with the average band size  
236 larger than 20 kb were isolated for stLFR libraries preparation from the male and  
237 female FAW, respectively. Two stLFR libraries with more than 30 million  
238 barcodes were constructed for running on the BGISEQ-500 sequencer. 110.93 Gb  
239 and 91.41 Gb high-quality reads were generated for the male and female  
240 individual, respectively (Table S2). The primary assembly sizes were 542.42 Mb  
241 and 530.77 Mb for the male and female individual. The scaffold N50 and N90 for  
242 the male individual were 507.12 Kb and 6.43 Kb, and that for the female were  
243 528.27 Kb and 5.11 Kb, respectively (Table 2). After getting the confirmation from  
244 Hi-C sequencing, we finally concatenated the scaffolds to 31 chromosomes with  
245 the scaffold N50 of 14.16 Mb and 14.89 Mb for the male and female individual,  
246 respectively. Genomes sizes assembled in this study are in the range of the  
247 lepidoptera genome sizes at 246M to 809M<sup>60</sup>, but are larger than previously  
248 assembled FAW genomes<sup>45-47</sup>, probably due to the use of the new stLFR  
249 technology with the super high coverage and reads quality. This is the first time  
250 to assemble the genome of the FAW to the chromosome level, which will be in no  
251 doubt to accelerate the biological studies and making the effective strategy of  
252 pest managements.

253 Table2 Summary of the two *Spodoptera frugiperda* genome assemblies



| Methods              | Statistics        | SFynMstLFR           |        |                    |        | SFynFMstLFR          |        |                    |        |
|----------------------|-------------------|----------------------|--------|--------------------|--------|----------------------|--------|--------------------|--------|
|                      |                   | Scaffold Length (bp) | Number | Contig Length (bp) | Number | Scaffold Length (bp) | Number | Contig Length (bp) | Number |
| stLFR                | N50               | 507,121              | 226    | 91,970             | 1,220  | 528,269              | 231    | 83,007             | 1,299  |
|                      | Total length (bp) | 542,424,128          |        | 505,703,627        |        | 530,766,122          |        | 496,217,290        |        |
|                      | Ratio of Ns (%)   | 6.77                 |        |                    |        | 6.51                 |        |                    |        |
|                      | GC content (%)    | 36.52                |        |                    |        | 36.57                |        |                    |        |
| HiC                  | N50               | 14,162,803           | 16     | 91,970             | 1,220  | 14,883,732           | 13     | 124,992            | 813    |
|                      | Total length (bp) | 543,659,128          |        | 505,703,627        |        | 531,931,622          |        | 496,217,290        |        |
|                      | Ratio of Ns (%)   | 6.98                 |        |                    |        | 6.71                 |        |                    |        |
|                      | GC content (%)    | 36.52                |        |                    |        | 36.58                |        |                    |        |
| Chromosome Level     |                   | 461,198,141          | 31     |                    |        | 435,876,255          | 31     |                    |        |
| Chromosome Level (%) |                   | 84.83                |        |                    |        | 81.94                |        |                    |        |

254

### 255 3.2 Evaluation of the assembly

256 The GC content for the genomes of the male and female individual was found to  
257 be 35.52% and 36.57% (Table 2), respectively, which showed a similar level with  
258 most closely related Lepidoptera species ranging from 31.6% to 37.7%<sup>61</sup>. We used  
259 the Benchmarking Universal Single-Copy Orthologs (BUSCO: version 2.0)<sup>62</sup> and  
260 Core Eukaryotic Genes (CEGMA)<sup>63</sup> to evaluated the completeness of the two  
261 assemblies. In BUSCO analysis, genomes of the male and female samples  
262 covered 95% and 94.5% complete BUSCO genes (Table S3). In the CEGMA  
263 analysis, 83.47% and 85.48% complete core eukaryotic genes were found for the  
264 two genomes (Table S4). This is better than all FAW genomes that has been  
265 published (PRJNA380964; PRJNA257248; PRJEB13110; and PRJNA344686).  
266 Besides, we also mapped the sequencing data generated from libraries of Hi-C,  
267 MatePair5K, WGS, and the RNA-seq to the assembled male genome. The  
268 mapping rates were all higher than 90% (Table 3), and the insert size were also  
269 consistent with the libraries, except for the MatePair5K, probably because the  
270 large insert size cannot ensure that the one pair reads they mapped to the same  
271 scaffold. EST sequences of the FAW were downloaded from NCBI and the  
272 transcripts were assembled without reference. We mapped these EST sequences  
273 and transcripts to the male reference genome we assembled, and the results  
274 showed that more than 90% EST sequences and more than 80% transcripts we  
275 assembled could be found on the assembled male genome (Table S5). However,  
276 it is noteworthy that the transcript from SFgdRNA 2 has a lower mapping rate  
277 than that of SFgdRNA 1. We inferred that this resulted due to the genetic  
278 differences between the C strain and the R strain, because the SFgdRNA 2

279 sample was identified belong to the R strain. Overall, all the above results well  
280 testified the completeness of the two genomes.

**Table 3 Mapping reads against the assembled male genome using raw reads generated by different libraries**

| Type                   | HIC    | MatePair | stLFR  | RNA-seq | WGS    |
|------------------------|--------|----------|--------|---------|--------|
| Total Mapped Reads     | 93.58% | 93.68%   | 95.60% | 98.98%  | 90.71% |
| Perfect Match          | 38.81% | 38.54%   | 43.67% | 52.14%  | 27.76% |
| Unique Match           | 76.39% | 77.15%   | 83.23% | 76.99%  | 74.77% |
| Total Unmapped Reads   | 6.42%  | 6.32%    | 4.40%  | 1.02%   | 9.29%  |
| Total FullMapped Reads | 32.48% | 30.06%   | 71.45% | 52.46%  | 49.40% |

### 281 3.3 Annotation

282 We firstly used Repeat Modeler (v1.0.11), LTR finder (v1.0.5) and repeatscount  
283 (v1.0.5) methods to identify *de novo* repeat motifs by modeling *ab initio*, and these  
284 repeat motifs were added into the RepBase<sup>64</sup> library as known repeat elements.  
285 We then performed the RepeatMasker<sup>65</sup> to mask the assembly, using the  
286 combined RepBase library. Usually, Repeat elements take a substantial part of  
287 the genome and contribute as important events to genome evolution<sup>61,66,67</sup>. In this  
288 study, by the combination of *de novo* and homology-based searching, 153 Mbp  
289 repeat elements were finally identified for the male FAW, and accounting for  
290 28.24% the FAW genomes.

291 Gene prediction was carried out by both the homology-based and *de novo*  
292 methods using repeat masked genomes. For the *de novo* prediction, we used  
293 Augustus, glimmerHMM and SNAP (Table S6). For the homology-based  
294 approaches, *Bombyx mori*, *Danaus plexippus*, *Drosophila melanogaster* and  
295 *Spodoptera litura* genomes were used for homology alignments using the TblastN.  
296 Moreover, transcripts that were predicted with RNA-seq, Gene sets were then  
297 merged to form a non-redundant gene set with GLEAN; then all annotated genes  
298 were checked and filtered manually. A total of 22201 genes were finally obtained  
299 for the male samples (Table S6).

300 In the final gene set we identified, we found 94.2% compete for BUSCO genes  
301 and 95.16% CEGMA genes, which were all better than the published FAW  
302 genome (Table S7, Table S8). Of these identified genes, 93.48% was confirmed  
303 that have functions (Table S9), which was facilitated the further exploration of  
304 the functions. Besides, we also found 60 miRNAs, 840 tRNAs and 197 rRNAs by  
305 using the homology prediction method.

### 306 3.4 The transcriptome analysis of the larvae

307 After filtering, we finally obtained 58Gb clean data with 341,526,489 cleaned  
308 reads. These reads were assembled into 72,604 contigs with the N50 of 2077bp.  
309 These contigs were further assembled into scaffolds, and the scaffolds were  
310 further assembled to 51,495 unigenes by clustering and removing redundancy.  
311 The contig number in our study are significantly higher than that in the study of  
312 Kakumani *et al*<sup>68</sup>. This maybe result from that we only used a single method for  
313 assembly. We also calculated the expression abundance for unigenes between the  
314 fifth-instar and sixth-instar larvae. The result showed 2,648 differentially  
315 expressed genes (DEGs). We further performed the clustering analysis to cluster  
316 genes with identical or similar expressed behaviors. Remarkable expression  
317 difference was found between the fifth-instar larvae and the sixth-instar larvae  
318 (Figure S1). This difference was in consistent with the different strains of the two  
319 larvae (we described in 3.6). However, if the different instar contributes to the  
320 differential expression, it was further confirmed by more detailed analysis.

### 321 3.5 Comparison to other published lepidopteran genomes

322 To further explore the detailed relationship between the FAW and its other  
323 lepidopteran relatives. We constructed a phylogenetic tree of nine genomes using  
324 2,001 single copy genes downloaded from NCBI and insectbase (Table S10). The  
325 result showed that the *S. frugiperda* which we sequenced actually clustered with  
326 its most related species *S. litura*, which is in accordance with the study by Cheng  
327 *et al*<sup>69</sup>(Figure 3).

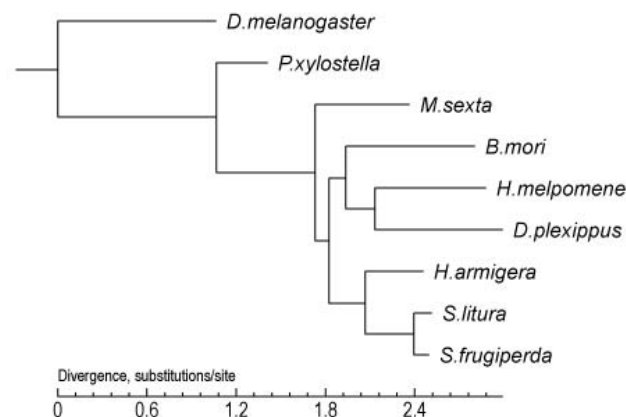

328

329 Figure 3 The phylogenetic relationships among nine lepidopteran genomes.

330 Through the gene family analysis, a total of 12,516 gene families were found in  
331 the *S. frugiperda* genome, including 20,012 genes. Of these gene families, 324 are  
332 specific to the *S. frugiperda* compared to the other seven species (Table S11). Then,  
333 we analyzed the 34 functional gene families of insects, finding some expanded  
334 gene families, including cytochrome p450, glutathione s-transferase, and  
335 hydrolase (Table 4). The cytochrome p450 gene family is closely related with

336 intensified detoxification<sup>69</sup>, the genes in this family of the *S. frugiperda* is 200,  
 337 more than that of *S. litura*, which indicated that the *S. frugiperda* was more  
 338 polyphagous than *S. litura*. This is also consistent with the habits of *S. frugiperda*.  
 339 The expanded glutathione s-transferase gene family was proved that could  
 340 enhance the insecticides tolerance of the *S. litura*<sup>69</sup>. In this study, we found more  
 341 genes for *S. frugiperda*, which indicated that the *S. frugiperda* was probably easier  
 342 to gain resistance to pesticides. These gene families are a valuable genetic source  
 343 to develop more effective pesticides or other methods to manage the FAW.

**Table 4 Identified genes in gene families of 9 insects**

|                                  | DME | PXY | MSE | BMO | HME | DPL | HAR | SLI | SFR |
|----------------------------------|-----|-----|-----|-----|-----|-----|-----|-----|-----|
| ABC transporter                  | 55  | 76  | 40  | 40  | 35  | 38  | 36  | 86  | 66  |
| acetylcholine receptor           | 18  | 27  | 20  | 27  | 24  | 28  | 22  | 22  | 27  |
| Acetylcholinesterase             | 27  | 39  | 62  | 51  | 32  | 27  | 82  | 87  | 46  |
| alkaline phosphatase             | 13  | 10  | 11  | 10  | 8   | 8   | 8   | 11  | 12  |
| aminopeptidase                   | 45  | 53  | 49  | 37  | 35  | 39  | 15  | 19  | 24  |
| carboxylesterase                 | 30  | 55  | 90  | 70  | 50  | 54  | 100 | 110 | 84  |
| Chitinase                        | 45  | 27  | 28  | 24  | 26  | 32  | 23  | 26  | 46  |
| chloride channel                 | 16  | 25  | 20  | 23  | 18  | 19  | 19  | 16  | 24  |
| CTL                              | 2   | 4   | 3   | 2   | 2   | 2   | 3   | 4   | 4   |
| cytochrome p450                  | 104 | 108 | 144 | 96  | 130 | 99  | 121 | 132 | 200 |
| DNA methyltransferase            | 1   | 1   | 1   | 1   | 1   | 1   | 1   | 1   | 1   |
| ecdysone receptor                | 1   | 1   | 3   | 3   | 3   | 2   | 3   | 1   | 3   |
| GABA                             | 15  | 16  | 32  | 9   | 12  | 15  | 16  | 14  | 10  |
| glutamate-gated chloride channel | 10  | 14  | 12  | 13  | 10  | 10  | 12  | 12  | 14  |
| Glutathione s-transferase        | 50  | 28  | 42  | 25  | 23  | 25  | 46  | 47  | 60  |
| glycosyltransferase              | 65  | 25  | 23  | 19  | 24  | 22  | 19  | 21  | 31  |
| G protein                        | 23  | 42  | 36  | 31  | 26  | 29  | 29  | 29  | 30  |
| gustatory receptor               | 54  | 69  | 45  | 76  | 73  | 68  | 197 | 238 | 220 |
| heat shock protein               | 45  | 38  | 54  | 35  | 29  | 46  | 40  | 48  | 45  |
| hydrolase                        | 213 | 250 | 243 | 209 | 181 | 204 | 267 | 310 | 396 |
| immunoglobulin                   | 65  | 51  | 70  | 76  | 56  | 69  | 71  | 67  | 80  |
| odorant-binding protein          | 62  | 65  | 70  | 51  | 87  | 63  | 77  | 61  | 70  |
| odorant receptor                 | 67  | 82  | 79  | 43  | 73  | 64  | 87  | 75  | 75  |
| Painless                         | 1   | 1   | 1   | 1   | 1   | 1   | 1   | 1   | 1   |
| pheromone                        | 43  | 22  | 29  | 15  | 19  | 14  | 16  | 14  | 19  |
| protease inhibitor               | 75  | 33  | 60  | 38  | 26  | 36  | 46  | 39  | 51  |
| Ryanodine receptor               | 6   | 12  | 3   | 7   | 4   | 8   | 6   | 3   | 6   |
| sensory neuron membrane protein  | 3   | 5   | 4   | 5   | 4   | 7   | 7   | 3   | 10  |
| serpin                           | 35  | 23  | 30  | 18  | 19  | 24  | 21  | 18  | 26  |
| sirtuin                          | 6   | 4   | 3   | 5   | 5   | 5   | 7   | 7   | 7   |

|                       |    |    |    |    |    |    |    |    |    |
|-----------------------|----|----|----|----|----|----|----|----|----|
| sodium channel        | 38 | 30 | 33 | 24 | 15 | 27 | 30 | 25 | 36 |
| sugar transporter     | 17 | 51 | 42 | 36 | 40 | 37 | 41 | 40 | 59 |
| superoxide dismutase  | 17 | 18 | 12 | 12 | 9  | 11 | 12 | 13 | 36 |
| Vitellogenin receptor | 8  | 14 | 15 | 11 | 9  | 12 | 16 | 14 | 15 |

Note: gene families come from <http://www.insect-genome.com/genefamily/gene-family.php>

344

345 3.6 FAW in China includes both the C and R strain, possibly invaded from Africa

346 There are three strain-specific sites (E4165, E4168 and E4183) in the fourth exon of  
 347 the *Tpi* gene that can identify the C strain from the R strain for Western  
 348 Hemisphere populations<sup>57</sup>. Especially, the E4183 is an effective diagnostic marker  
 349 for *Tpi* gene to define the C or R strain. In this study, two Yunnan samples and  
 350 one Guangdong sample were identified as the C strain and the other one  
 351 Guangdong sample was identified as the R strain (Figure 4). The phylogenetic  
 352 tree showed that the two Yunnan samples were clustered in the clade that  
 353 consisted of all C strain individuals, which strengthened the results inferred  
 354 using the strain-specific sites in the fourth exon (Figure 5). This result at least  
 355 showed that the FAW invaded into China included both the strains. However,  
 356 the detailed population genetic structure and the frequencies of the two strains in  
 357 the Chinese population need more information from the population-level  
 358 studies.

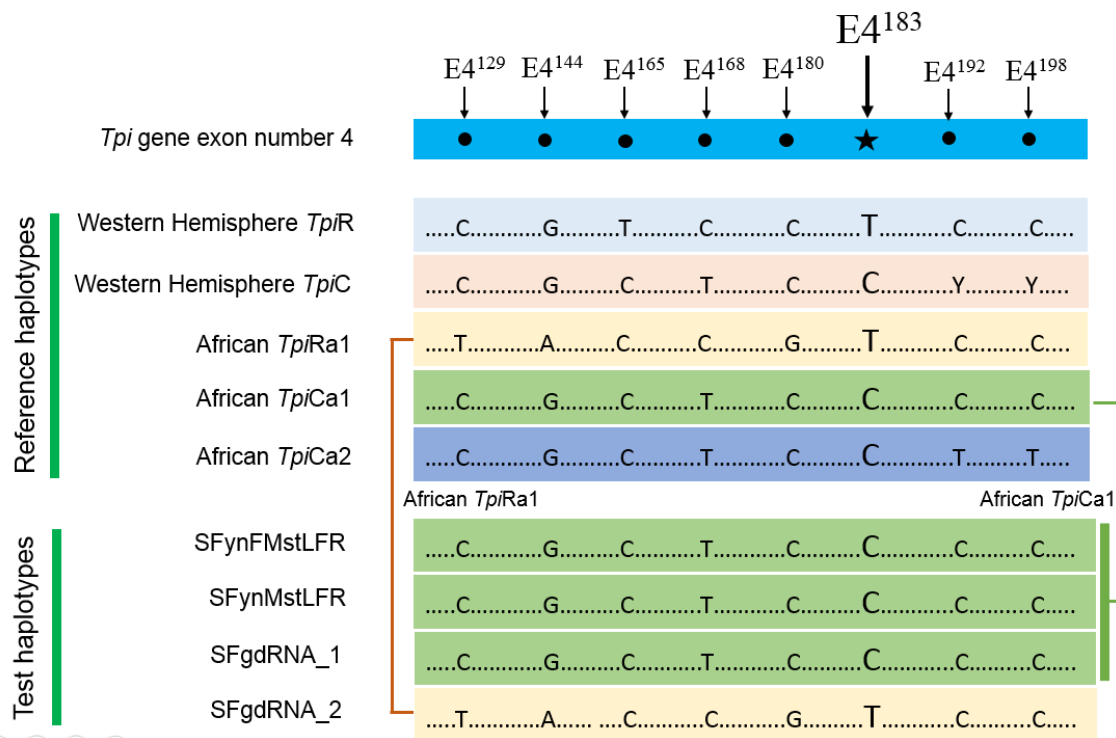

359

360

Figure 4 The identification of C and R strains.

361 To further confirm the possible source of the Chinese FAW, we compared the  
362 haplotype consisted of all eight polymorphisms in the fourth exon of the *Tpi* gene  
363 as shown in the Figure 4. We found that all the four individuals hold identical  
364 haplotype with the African population, including three *Tpi*Ca1 and one *Tpi*Ra1.  
365 Although the haplotype of C strain was shared by the African and the Western  
366 Hemisphere populations<sup>57</sup>, the *Tpi*Ra1 has not been detected in any Western  
367 Hemisphere populations<sup>57</sup> showing the uniqueness to African populations. The  
368 finding of the *Tpi*Ra1 haplotype in the Guangdong population indicated that  
369 there were at least parts of the FAW populations in China that was invaded from  
370 Africa, probably through the frequent commercial trade and passenger  
371 transportation between Africa and China<sup>5</sup>. However, we cannot confirm other  
372 sources because of the small sample size we used here. The strain information  
373 and possible invasion source found in this study will be extremely important for  
374 making effective strategies to manage the FAWs in China.

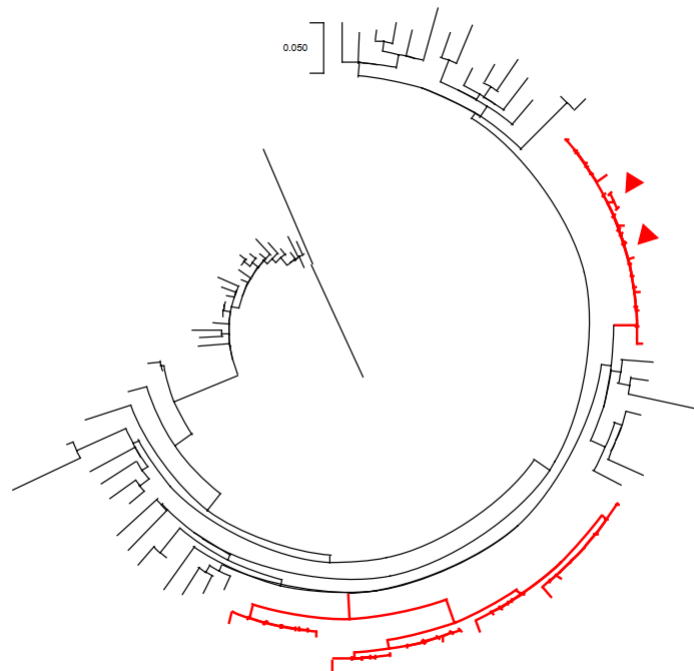

375  
376 Figure 5 The phylogenetic tree to identify the FAW strains of collected from Yunnan, China. The  
377 red branched presented the C strain, the red triangles present the two Yunnan samples.

#### 378 4 Conclusions

379 In summary, we assembled two chromosome scale genomes of the fall  
380 armyworm, representing one male and one female individual procured from  
381 Yunnan province of China. The genome sizes were identified as 542.42 Mb with  
382 N50 of 14.16 Mb, and 530.77 Mb with N50 of 14.89 Mb for the male and female  
383 FAW, respectively. . The completeness of the two genomes are better than all

384 previously published FAW genomes which is evident by the BUSCO and  
385 CEGMA analysis. A total of 22,201 genes were predicted in the male genome,  
386 and 12,516 gene families were found in the *S. frugiperda* genome, including 20,012  
387 genes. Of these gene families, we found expansion of cytochrome p450 and  
388 glutathione s-transferase gene families, which were closely related to the function  
389 of intensified detoxification and pesticides tolerance. We finally identified both  
390 the R strain and C strain individuals in the Chinese population, showed that the  
391 Chinese FAW was most likely invaded from Africa. The strain information and  
392 possible invasion source found in this study will be extremely important for  
393 making the effective strategies to manage the FAWs in China.

### 394 **Acknowledgements**

395 This study was supported by the Guangdong Provincial Key Laboratory of core  
396 collection of corp genetic resources research and application  
397 (NO.2011A091000047), Guangdong Provincial Key Laboratory of Genome Read  
398 and Write (grant no. 2017B030301011) and Key Laboratory of Genomics ,Ministry  
399 of Agriculture.

### 400 **Data availability**

401 The Raw sequencing data and the two chromosome level genome assemblies  
402 have been deposited to the CNSA (CNGB Nucleotide Sequence Archive) with  
403 accession CNP0000513 (<https://db.cngb.org/cnsa/>).

### 404 **Author Contributions**

405 Huanming Yang, Le Kang, Jun Sheng, Youyong Zhu, Yang Dong, Xin Liu and  
406 Huan Liu designed the research. Dongming Fang, Tianming Lan and Yue Chang,  
407 Hongli Wang, Fangneng Huang, Wei Dong and Guangyi Fan performed the data  
408 analysis. Xiaofang Chen, Haorong Lu, Ping Liu, Tongxian Liu, Rushi Hao, Bin  
409 Chen, Shusheng Zhu, Zhihui Lu and Haimeng Li performed the DNA and RNA  
410 extraction and the library preparation. Huan Liu, Tianming Lan, Yang Dong, Wei  
411 Guo, Shuqi He, Le Chen and Lihua Lyu collected the samples. Tianming Lan,  
412 Dongming Fang, Hongli Wang, Sunil Kumar Sahu and Furong Gui wrote and  
413 revised the manuscript. All the authors read and revised the final version of the  
414 manuscript.

### 415 **Competing interests**

416 The authors declare no competing interests.

417

418 1 Hinds, W. E. & Dew, J. A. The grass worm or fall army worm. *Alabama*  
419 *Agricultural and Experiment Station Bulletin* **186**, 25 (1915).

- 420 2 Pair, S. D., Raulston, J. R., Westbrook, J. K., Wolf, W. W. & Adams, S. D. Fall  
421 Armyworm (Lepidoptera Noctuidae) Outbreak Originating in the Lower Rio  
422 Grande Valley, 1989. *Florida Entomologist* **74**, 14 (1991).
- 423 3 Nagoshi, R. N., Meagher, R. L. & Hay-Roe, M. Inferring the annual migration  
424 patterns of fall armyworm (Lepidoptera: Noctuidae) in the United States from  
425 mitochondrial haplotypes. *Ecology and evolution* **2**, 1458-1467, doi:10.1002/ece3.268  
426 (2012).
- 427 4 Mitchell, E. R. *et al.* Seasonal Periodicity of Fall Armyworm, (Lepidoptera  
428 Noctuidae) in the Caribbean Basin and Northward to Canada. *Journal of*  
429 *entomological science* **26**, 12 (1991).
- 430 5 Early, R., González-Moreno, P., Murphy, S. T. & Day, R. Forecasting the global  
431 extent of invasion of the cereal pest *Spodoptera frugiperda*, the fall armyworm.  
432 *NeoBiota* **40**, 25-50, doi:10.3897/neobiota.40.28165 (2018).
- 433 6 Johnson, S. J. Migration and the life history strategy of the fall armyworm,  
434 *Spodoptera frugiperda* in the Western Hemisphere. *Insect Sci. Appli* **8**, 7 (1987).
- 435 7 du Plessis, H., van den Berg, J., Ota, N. & Kriticos, D. J. *Spodoptera frugiperda*  
436 (Fall Armyworm). *CSIRO-InSTePP Pest Geography* (2018).
- 437 8 Westbrook, J. K., Nagoshi, R. N., Meagher, R. L., Fleischer, S. J. & Jairam, S.  
438 Modeling seasonal migration of fall armyworm moths. *International journal of*  
439 *biometeorology* **60**, 255-267, doi:10.1007/s00484-015-1022-x (2016).
- 440 9 Goergen, G., Kumar, P. L., Sankung, S. B., Togola, A. & Tamo, M. First Report of  
441 Outbreaks of the Fall Armyworm *Spodoptera frugiperda* (J E Smith)  
442 (Lepidoptera, Noctuidae), a New Alien Invasive Pest in West and Central Africa.  
443 *PLoS one* **11**, e0165632, doi:10.1371/journal.pone.0165632 (2016).
- 444 10 FAO. Briefing Note on FAO Actions on Fall Armyworm in Africa  
445 <http://www.fao.org/3/a-bt415e.pdf> (2017).
- 446 11 Cock, M. J. W., Beseh, P. K., Buddie, A. G., Cafa, G. & Crozier, J. Molecular  
447 methods to detect *Spodoptera frugiperda* in Ghana, and implications for  
448 monitoring the spread of invasive species in developing countries. *Scientific*  
449 *reports* **7**, 4103, doi:10.1038/s41598-017-04238-y (2017).
- 450 12 Sharanabasappa *et al.* First report of fall armyworm, *Spodoptera frugiperda* (J E  
451 smith) (Lepidoptera: Noctuidae), an alien invasive pest on maize in India. *Pest*  
452 *Management in Horticultural Ecosystems* **24**, 7 (2018).
- 453 13 Ganiger, P. C. *et al.* Occurrence of the new invasive pest, fall armyworm,  
454 *Spodoptera frugiperda* (J.E. Smith) (Lepidoptera: Noctuidae), in the maize fields  
455 of Karnataka, India. *Current Science* **115**, 3 (2018).
- 456 14 Portal, C. F. A. Available online: <https://www.cabi.org/isc/fallarmyworm>  
457 (accessed on 6 June 2019).
- 458 15 CABI. Invasive Species Compendium. <https://www.cabi.org/isc/fallarmyworm>.
- 459 16 Casmuz, A. *et al.* Revisión de los hospederos del gusano cogollero del maíz,  
460 *Spodoptera frugiperda* (Lepidoptera: Noctuidae). *Revista de la Sociedad*  
461 *Entomológica Argentina* **69**, 23 (2010).



- 462 17 Murúa, G., Molina-Ochoa, J. & Coviella, C. Population dynamics of the fall  
463 armyworm, *Spodoptera frugiperda* (Lepidoptera: Noctuidae) and its parasitoids  
464 in northwestern Argentina. *Florida Entomologist* **89**, 8 (2006).
- 465 18 Silva-Aguayo, G. *et al.* Bioactivity of Boldo (*Peumus boldus* Molina) (Laurales:  
466 Monimiaceae) on *Spodoptera frugiperda* (J.E. Smith) and *Helicoverpa zea* (Boddie)  
467 (Lepidoptera: Noctuidae). *Southwestern Entomologist* **35**, 215-231,  
468 doi:10.3958/059.035.0301 (2010).
- 469 19 Wyckhuys, K. A. G. & O'Neil, R. J. Population dynamics of *Spodoptera*  
470 *frugiperda* Smith (Lepidoptera: Noctuidae) and associated arthropod natural  
471 enemies in Honduran subsistence maize. *Crop Protection* **25**, 1180-1190,  
472 doi:10.1016/j.cropro.2006.03.003 (2006).
- 473 20 Day, R. *et al.* Fall Armyworm: Impacts and Implications for Africa. *Outlooks on*  
474 *Pest Management* **28**, 196-201, doi:10.1564/v28\_oct\_02 (2017).
- 475 21 Sisay, B. *et al.* First report of the fall armyworm, *Spodoptera frugiperda*  
476 (Lepidoptera: Noctuidae), natural enemies from Africa. *Journal of Applied*  
477 *Entomology* **142**, 800-804, doi:10.1111/jen.12534 (2018).
- 478 22 Gordy, J. W., Leonard, B. R., Blouin, D., Davis, J. A. & Stout, M. J. Comparative  
479 Effectiveness of Potential Elicitors of Plant Resistance against *Spodoptera*  
480 *frugiperda* (J. E. Smith) (Lepidoptera: Noctuidae) in Four Crop Plants. *PloS one*  
481 **10**, e0136689, doi:10.1371/journal.pone.0136689 (2015).
- 482 23 Midega, C. A. O. *et al.* Farmers' perceptions of cotton pests and their  
483 management in western Kenya. *Crop Protection* **42**, 193-201,  
484 doi:10.1016/j.cropro.2012.07.010 (2012).
- 485 24 Dal Pogetto, M. H. F. A. *et al.* Corn Yield with Reduction of Insecticidal Sprayings  
486 Against Fall Armyworm *Spodoptera frugiperda* (Lepidoptera Noctuidae). *Journal*  
487 *of Agronomy* **11**, 5, doi:10.3923/ja.2012.17.21 (2012).
- 488 25 Fotso Kuate, A. *et al.* *Spodoptera frugiperda* Smith (Lepidoptera: Noctuidae) in  
489 Cameroon: Case study on its distribution, damage, pesticide use, genetic  
490 differentiation and host plants. *PloS one* **14**, e0215749,  
491 doi:10.1371/journal.pone.0215749 (2019).
- 492 26 Yu, S. J., Nguyen, S. N. & Abo-Elghar, G. E. Biochemical characteristics of  
493 insecticide resistance in the fall armyworm, *Spodoptera frugiperda* (J.E. Smith).  
494 *Pesticide Biochemistry and Physiology* **77**, 1-11, doi:10.1016/s0048-3575(03)00079-8  
495 (2003).
- 496 27 de Bon, H. *et al.* Pesticide risks from fruit and vegetable pest management by  
497 small farmers in sub-Saharan Africa. A review. *Agronomy for Sustainable*  
498 *Development* **34**, 723-736, doi:10.1007/s13593-014-0216-7 (2014).
- 499 28 Sousa, F. F. *et al.* Life-History Traits of *Spodoptera frugiperda* Populations  
500 Exposed to Low-Dose Bt Maize. *PloS one* **11**, e0156608,  
501 doi:10.1371/journal.pone.0156608 (2016).
- 502 29 Bernardi, D. *et al.* Cross-Resistance between Cry1 Proteins in Fall Armyworm  
503 (*Spodoptera frugiperda*) May Affect the Durability of Current Pyramided Bt

- 504 Maize Hybrids in Brazil. *PloS one* **10**, e0140130, doi:10.1371/journal.pone.0140130  
505 (2015).
- 506 30 Aguirre, L. A. *et al.* Evaluation of Foliar Damage by *Spodoptera*  
507 *frugiperda* (Lepidoptera: Noctuidae) to Genetically Modified Corn (Poales:  
508 Poaceae) in Mexico. *Florida Entomologist* **99**, 276-280, doi:10.1653/024.099.0218  
509 (2016).
- 510 31 Midega, C. A. O., Pittchar, J. O., Pickett, J. A., Hailu, G. W. & Khan, Z. R. A  
511 climate-adapted push-pull system effectively controls fall armyworm,  
512 *Spodoptera frugiperda* (J E Smith), in maize in East Africa. *Crop Protection* **105**,  
513 10-15, doi:10.1016/j.cropro.2017.11.003 (2018).
- 514 32 Kenis, M. *et al.* *Telenomus Remus*, a Candidate Parasitoid for the Biological  
515 Control of *Spodoptera Frugiperda* in Africa, is already Present on the Continent.  
516 *Insects* **10**, doi:10.3390/insects10040092 (2019).
- 517 33 Pashley, D. P. Host-associated Genetic Differentiation in Fall Armyworm  
518 (Lepidoptera: Noctuidae): A Sibling Species Complex? *Annals of the Entomological*  
519 *Society of America* **79**, 7 (1986).
- 520 34 Juárez, M. L. *et al.* Population structure of *Spodoptera frugiperda* maize and rice  
521 host forms in South America: are they host strains? *Entomologia Experimentalis et*  
522 *Applicata* **152**, 182-199, doi:10.1111/eea.12215 (2014).
- 523 35 Nagoshi, R. N. *et al.* Analysis of strain distribution, migratory potential, and  
524 invasion history of fall armyworm populations in northern Sub-Saharan Africa.  
525 *Scientific reports* **8**, 3710, doi:10.1038/s41598-018-21954-1 (2018).
- 526 36 Nagoshi, R. N. & Meagher, R. L. Behavior and distribution of the two fall  
527 armyworm host strains in Florida. *Florida Entomologist* **87**, 10,  
528 doi:[http://dx.doi.org/10.1653/0015-4040\(2004\)087\[0440:BADOTT\]2.0.CO;2](http://dx.doi.org/10.1653/0015-4040(2004)087[0440:BADOTT]2.0.CO;2) (2004).
- 529 37 Meagher, R. L. & Nagoshi, R. N. Differential Feeding of Fall Armyworm  
530 (Lepidoptera: Noctuidae) Host Strains on Meridic and Natural Diets. *Annals of*  
531 *the Entomological Society of America* **105**, 462-470, doi:10.1603/an11158 (2012).
- 532 38 Nagoshi, R. N., Silvie, P. & Meagher, R. L. Comparison of Haplotype Frequencies  
533 Differentiate Fall Armyworm (Lepidoptera Noctuidae) Corn-Strain Populations  
534 from Florida and Brazil. *Molecular Entomology* **100**, 8, doi:10.1603/0022-  
535 0493(2007)100[954:cohfdf]2.0.co;2 (2007).
- 536 39 Nagoshi, R. N. *et al.* Haplotype Profile Comparisons Between *Spodoptera*  
537 *frugiperda* (Lepidoptera: Noctuidae) Populations From Mexico With Those From  
538 Puerto Rico, South America, and the United States and Their Implications to  
539 Migratory Behavior. *Journal of economic entomology* **108**, 135-144,  
540 doi:10.1093/jee/tou044 (2015).
- 541 40 Nagoshi, R. N. *et al.* Using Haplotypes to Monitor the Migration of Fall  
542 Armyworm (Lepidoptera Noctuidae) Corn-Strain Populations from Texas and  
543 Florida. *Journal of economic entomology* **101**, 8, doi:10.1603/0022-  
544 0493(2008)101[742:uhtmtm]2.0.co;2 (2008).

- 545 41 Nagoshi, R. N. *et al.* Fall armyworm migration across the Lesser Antilles and the  
546 potential for genetic exchanges between North and South American populations.  
547 *PloS one* **12**, e0171743, doi:10.1371/journal.pone.0171743 (2017).
- 548 42 Unbehend, M. *et al.* Geographic variation in sexual attraction of *Spodoptera*  
549 *frugiperda* corn- and rice-strain males to pheromone lures. *PloS one* **9**, e89255,  
550 doi:10.1371/journal.pone.0089255 (2014).
- 551 43 Adamczyk Jr, J. J., Holloway, J. W., Leonard, B. R. & Graves, J. B. Susceptibility of  
552 Fall Armyworm Collected from Different Plant Hosts to Selected Insecticides and  
553 Transgenic Bt Cotton. *Journal of Cotton Science* **1**, 8 (1997).
- 554 44 Nagoshi, R. N. Evidence that a major subpopulation of fall armyworm found in  
555 the Western Hemisphere is rare or absent in Africa, which may limit the range of  
556 crops at risk of infestation. *PloS one* **14**, e0208966,  
557 doi:10.1371/journal.pone.0208966 (2019).
- 558 45 Kakumani, P. K., Malhotra, P., Mukherjee, S. K. & Bhatnagar, R. K. A draft  
559 genome assembly of the army worm, *Spodoptera frugiperda*. *Genomics* **104**, 134-  
560 143, doi:10.1016/j.ygeno.2014.06.005 (2014).
- 561 46 Gouin, A. *et al.* Two genomes of highly polyphagous lepidopteran pests  
562 (*Spodoptera frugiperda*, Noctuidae) with different host-plant ranges. *Scientific*  
563 *reports* **7**, 11816, doi:10.1038/s41598-017-10461-4 (2017).
- 564 47 Nandakumar, S., Ma, H. & Khan, A. S. Whole-Genome Sequence of the  
565 *Spodoptera frugiperda* Sf9 Insect Cell Line. *Genome Announcements* **5**:e00829-17,  
566 doi:https://doi.org/10.1128/genomeA.00829-17 (2017).
- 567 48 Cheng, X. *et al.* A simple bead-based method for generating cost-effective co-  
568 barcoded sequence reads. 11 October 2018, *PROTOCOL (Version 1) available at*  
569 *Protocol Exchange* [[+https://doi.org/10.1038/protex.2018.116](https://doi.org/10.1038/protex.2018.116)].
- 570 49 Wang, O. *et al.* Efficient and unique cobarcoding of second-generation  
571 sequencing reads from long DNA molecules enabling cost-effective and accurate  
572 sequencing, haplotyping, and de novo assembly. *Genome research* **29**, 798-808,  
573 doi:10.1101/gr.245126.118 (2019).
- 574 50 Huang, J. *et al.* A reference human genome dataset of the BGISEQ-500 sequencer.  
575 *GigaScience* **6**, 1-9, doi:10.1093/gigascience/gix024 (2017).
- 576 51 Lieberman-Aiden, E. *et al.* Comprehensive mapping of long-range interactions  
577 reveals folding principles of the human genome. *Science* **326**, 289-293,  
578 doi:10.1126/science.1181369 (2009).
- 579 52 Weisenfeld, N. I., Kumar, V., Shah, P., Church, D. M. & Jaffe, D. B. Direct  
580 determination of diploid genome sequences. *Genome research* **27**, 757-767,  
581 doi:10.1101/gr.214874.116 (2017).
- 582 53 Luo, R. *et al.* SOAPdenovo2: an empirically improved memory-efficient short-  
583 read de novo assembler. *GigaScience* **1**, 18, doi:10.1186/2047-217X-1-18 (2012).
- 584 54 Dudchenko, O. *et al.* De novo assembly of the *Aedes aegypti* genome using Hi-C  
585 yields chromosome-length scaffolds. *Science* **356**, 92-95,  
586 doi:10.1126/science.aal3327 (2017).

- 587 55 Li, L., Stoeckert, C. J., Jr. & Roos, D. S. OrthoMCL: identification of ortholog  
588 groups for eukaryotic genomes. *Genome research* **13**, 2178-2189,  
589 doi:10.1101/gr.1224503 (2003).
- 590 56 Wang, Y. *et al.* MCScanX: a toolkit for detection and evolutionary analysis of  
591 gene synteny and collinearity. *Nucleic acids research* **40**, e49,  
592 doi:10.1093/nar/gkr1293 (2012).
- 593 57 Nagoshi, R. N., Goergen, G., Plessis, H. D., van den Berg, J. & Meagher, R., Jr.  
594 Genetic comparisons of fall armyworm populations from 11 countries spanning  
595 sub-Saharan Africa provide insights into strain composition and migratory  
596 behaviors. *Scientific reports* **9**, 8311, doi:10.1038/s41598-019-44744-9 (2019).
- 597 58 Guindon, S. *et al.* New algorithms and methods to estimate maximum-likelihood  
598 phylogenies: assessing the performance of PhyML 3.0. *Systematic biology* **59**, 307-  
599 321, doi:10.1093/sysbio/syq010 (2010).
- 600 59 Chenna, R. *et al.* Multiple sequence alignment with the Clustal series of  
601 programs. *Nucleic acids research* **31**, 3497-3500, doi:10.1093/nar/gkg500 (2003).
- 602 60 Triant, D. A., Cinel, S. D. & Kawahara, A. Y. Lepidoptera genomes: current  
603 knowledge, gaps and future directions. *Current opinion in insect science* **25**, 99-105,  
604 doi:10.1016/j.cois.2017.12.004 (2018).
- 605 61 Nowell, R. W. *et al.* A high-coverage draft genome of the mycalesine butterfly  
606 *Bicyclus anynana*. *GigaScience* **6**, 1-7, doi:10.1093/gigascience/gix035 (2017).
- 607 62 Simao, F. A., Waterhouse, R. M., Ioannidis, P., Kriventseva, E. V. & Zdobnov, E.  
608 M. BUSCO: assessing genome assembly and annotation completeness with  
609 single-copy orthologs. *Bioinformatics* **31**, 3210-3212,  
610 doi:10.1093/bioinformatics/btv351 (2015).
- 611 63 Parra, G., Bradnam, K. & Korf, I. CEGMA: a pipeline to accurately annotate core  
612 genes in eukaryotic genomes. *Bioinformatics* **23**, 1061-1067,  
613 doi:10.1093/bioinformatics/btm071 (2007).
- 614 64 Bao, W., Kojima, K. K. & Kohany, O. Repbase Update, a database of repetitive  
615 elements in eukaryotic genomes. *Mobile DNA* **6**, 11, doi:10.1186/s13100-015-0041-9  
616 (2015).
- 617 65 Saha, S., Bridges, S., Magbanua, Z. V. & Peterson, D. G. Empirical comparison of  
618 ab initio repeat finding programs. *Nucleic acids research* **36**, 2284-2294,  
619 doi:10.1093/nar/gkn064 (2008).
- 620 66 Lorenzi, H. *et al.* Genome wide survey, discovery and evolution of repetitive  
621 elements in three *Entamoeba* species. *BMC genomics* **9**, 595, doi:10.1186/1471-  
622 2164-9-595 (2008).
- 623 67 Thybert, D. *et al.* Repeat associated mechanisms of genome evolution and  
624 function revealed by the *Mus caroli* and *Mus pahari* genomes. *Genome research* **28**,  
625 448-459, doi:10.1101/gr.234096.117 (2018).
- 626 68 Kakumani, P. K. *et al.* De novo transcriptome assembly and analysis of Sf21 cells  
627 using illumina paired end sequencing. *Biology direct* **10**, 44, doi:10.1186/s13062-  
628 015-0072-7 (2015).

629 69 Cheng, T. *et al.* Genomic adaptation to polyphagy and insecticides in a major East  
630 Asian noctuid pest. *Nature ecology & evolution* **1**, 1747-1756, doi:10.1038/s41559-  
631 017-0314-4 (2017).

632
